# Supplementary material for: New insights into anatomical connectivity along the anterior–posterior axis of the human hippocampus using in vivo quantitative fibre tracking
Source: eLife. 2022 Nov 8;11:e76143. doi: 10.7554/eLife.76143 (PMC9643002; doi:10.7554/eLife.76143)
Supplement: Supplementary file 3. [file elife-76143-supp3.docx]

**Supplementary File 3. List of abbreviations for all cortical brain areas in the Human Connectome Project Multi-Modal Parcellation (HCPMMP) scheme.**

| **Brain region** | **Cortical areas within each brain region** | |
| --- | --- | --- |
| Medial Temporal Cortex | EC | Entorhinal Cortex |
| PeEc | Perirhinal Ectorhinal Cortex |
| PHA1 | ParaHippocampal Area 1 |
| PHA2 | ParaHippocampal Area 2 |
| PHA3 | ParaHippocampal Area 3 |
| Lateral Temporal Cortex (including Temporal Pole) | PHT | Area PHT |
| TE1a | Area TE1 anterior |
| TE1m | Area TE1 Middle |
| TE1p | Area TE1 posterior |
| TE2a | Area TE2 anterior |
| TE2p | Area TE2 posterior |
| TF | Area TF |
| TGd | Area TG dorsal |
| TGv | Area TG Ventral |
| Medial Parietal Cortex (including Posterior Cingulate) | 23c | Area 23c |
| 23d | Area 23d |
| 31a | Area 31a |
| 31pd | Area 31pd |
| 31pv | Area 31p ventral |
| 7m | Area 7m |
| d23ab | Area dorsal 23 a+b |
| DVT | Dorsal Transitional Visual Area |
| PCV | PreCuneus Visual Area |
| POS1 | Parieto-Occipital Sulcus Area 1 |
| POS2 | Parieto-Occipital Sulcus Area 2 |
| ProS | ProStriate Area |
| RSC | RetroSplenial Complex |
| v23ab | Area ventral 23 a+b |
| Early Visual Cortex (Occipital) | V1 | Primary Visual Cortex |
| V2 | Second Visual Area |
| V3 | Third Visual Area |
| V4 | Fourth Visual Area |
| Ventral Stream Visual Cortex | FFC | Fusiform Face Complex |
| PIT | Posterior InferoTemporal Complex |
| V8 | Eighth Visual Area |
| VMV1 | VentroMedial Visual Area 1 |
| VMV2 | VentroMedial Visual Area 2 |
| VMV3 | VentroMedial Visual Area 3 |
| VVC | Ventral Visual Complex |
| Dorsal Stream Visual Cortex | IPS1 | IntraParietal Sulcus Area 1 |
| V3A | Area V3A |
| V3B | Area V3B |
| V6 | Sixth Visual Area |
| V6A | Area V6A |
| V7 | Seventh Visual Area |
| MT+ Complex and Neighbouring Visual Areas | FST | Area FST |
| LO1 | Area Lateral Occipital 1 |
| LO2 | Area Lateral Occipital 2 |
| LO3 | Area Lateral Occipital 3 |
| MST | Medial Superior Temporal Area |
| MT | Middle Temporal Area |
| PH | Area PH |
| V3CD | Area V3CD |
| V4t | Area V4t |
| Inferior Parietal Cortex | IP0 | Area IntraParietal 0 |
| IP1 | Area IntraParietal 1 |
| IP2 | Area IntraParietal 2 |
| PF | Area PF Complex |
| PFm | Area PFm Complex |
| PFop | Area PF opercular |
| PFt | Area PFt |
| PGi | Area PGi |
| PGp | Area PGp |
| PGs | Area PGs |
| Auditory Association Cortex | A4 | Auditory 4 Complex |
| A5 | Auditory 5 Complex |
| STGa | Area STGa |
| STSda | Area STSd anterior |
| STSdp | Area STSd posterior |
| STSva | Area STSv anterior |
| STSvp | Area STSv posterior |
| TA2 | Area TA2 |
| Insular and Frontal Opercular Cortex | 52 | Area 52 |
| AAIC | Anterior Agranular Insula Complex |
| AVI | Anterior Ventral Insular Area |
| FOP2 | Frontal Opercular Area 2 |
| FOP3 | Frontal Opercular Area 3 |
| FOP4 | Frontal Opercular Area 4 |
| FOP5 | Area Frontal Opercular 5 |
| Ig | Insular Granular Complex |
| MI | Middle Insular Area |
| PI | Para-Insular Area |
| Pir | Pirform Cortex |
| PoI1 | Area Posterior Insular 1 |
| PoI2 | Posterior Insular Area 2 |
| Superior Parietal Cortex | 7AL | Lateral Area 7A |
| 7Am | Medial Area 7A |
| 7PC | Area 7PC |
| 7PL | Lateral Area 7P |
| 7Pm | Medial Area 7P |
| AIP | Anterior IntraParietal Area |
| LIPd | Area Lateral IntraParietal dorsal |
| LIPv | Area Lateral IntraParietal ventral |
| MIP | Medial IntraParietal Area |
| VIP | Ventral IntraParietal Complex |
| Temporo-Parieto-Occipital Junction | PSL | PeriSylvian Language Area |
| STV | Superior Temporal Visual Area |
| TPOJ1 | Area TemporoParietoOccipital Junction 1 |
| TPOJ2 | Area TemporoParietoOccipital Junction 2 |
| TPOJ3 | Area TemporoParietoOccipital Junction 3 |
| Anterior Cingulate and Medial Prefrontal Cortex | 25 | Area 25 |
| 10r | Area 10r |
| 10v | Area 10v |
| 33pr | Area 33 prime |
| 8BM | Area 8BM |
| 9m | Area 9 Middle |
| a24 | Area a24 |
| a24pr | Anterior 24 prime |
| a32pr | Area anterior 32 prime |
| d32 | Area dorsal 32 |
| p24 | Area posterior 24 |
| p24pr | Area Posterior 24 prime |
| p32 | Area p32 |
| p32pr | Area p32 prime |
| s32 | Area s32 |
| Somatosensory and Motor Cortex | 1 | Area 1 |
| 2 | Area 2 |
| 4 | Primary Motor Cortex |
| 3a | Area 3a |
| 3b | Primary Sensory Cortex |
| 5m | Area 5m |
| Early Auditory Cortex | A1 | Primary Auditory Cortex |
| LBelt | Lateral Belt Complex |
| MBelt | Medial Belt Complex |
| PBelt | ParaBelt Complex |
| RI | RetroInsular Cortex |
| Paracentral Lobular and Mid Cingulate Cortex | 24dd | Dorsal Area 24d |
| 24dv | Ventral Area 24d |
| 5mv | Area 5m ventral |
| 5L | Area 5L |
| 6ma | Area 6m anterior |
| 6mp | Area 6mp |
| SCEF | Supplementary and Cingulate Eye Field |
| Dorsolateral Prefrontal Cortex | 46 | Area 46 |
| 8Ad | Area 8Ad |
| 8Av | Area 8Av |
| 8BL | Area 8B Lateral |
| 8C | Area 8C |
| 9-46d | Area 9-46d |
| 9a | Area 9 anterior |
| 9p | Area 9 Posterior |
| a9-46v | Area anterior 9-46v |
| i6-8 | Inferior 6-8 Transitional Area |
| p9-46v | Area posterior 9-46v |
| s6-8 | Superior 6-8 Transitional Area |
| SFL | Superior Frontal Language Area |
| Premotor Cortex | 55b | Area 55b |
| 6a | Area 6 anterior |
| 6d | Dorsal area 6 |
| 6r | Rostral Area 6 |
| 6v | Ventral Area 6 |
| FEF | Frontal Eye Fields |
| PEF | Premotor Eye Field |
| Orbital and Polar Frontal Cortex | 10d | Area 10d |
| 10pp | Polar 10p |
| 11l | Area 11l |
| 13l | Area 13l |
| 47m | Area 47m |
| 47s | Area 47s |
| a10p | Area anterior 10p |
| a47r | Area anterior 47r |
| OFC | Orbital Frontal Complex |
| p10p | Area posterior 10p |
| pOFC | posterior OFC Complex |
| Inferior Frontal Cortex | 44 | Area 44 |
| 45 | Area 45 |
| 47l | Area 47l (47 lateral) |
| IFJa | Area IFJa |
| IFJp | Area IFJp |
| IFSa | Area IFSa |
| IFSp | Area IFSp |
| p47r | Area posterior 47r |
| Posterior Opercular Cortex | 43 | Area 43 |
| FOP1 | Frontal Opercular Area 1 |
| OP1 | Area OP1/SII |
| OP2-3 | Area OP2-3/VS |
| OP4 | Area OP4/PV |
| PFcm | Area PFcm |
